# Supplementary material
Source: PubMed Central journal article supplement (PMC6761569)
Supplement: AAC.01234-19-s0001.pdf [file AAC.01234-19-s0001.pdf]

Supplemental Table 1: Non-synonymous polymorphisms detected before and after introduction of ACTs.  
Mixed genotypes are considered mutant.

| Polymorphism       | 1999-2006<br>(N=638) | 2012-2016<br>(N = 716) | p-value |
|--------------------|----------------------|------------------------|---------|
| L457I              | 1 (0.15 %)           | 0 (0.00%)              | 0.49    |
| I465T              | 0 (0.00%)            | 1 (0.14%)              | 1.00    |
| C469F*             | 0 (0.00%)            | 1 (0.14%)              | 1.00    |
| C469Y**            | 0 (0.00%)            | 1 (0.14%)              | 1.00    |
| W470R              | 0 (0.00%)            | 1 (0.14%)              | 1.00    |
| M472V              | 0 (0.00%)            | 1 (0.14%)              | 1.00    |
| G496S              | 1 (0.15 %)           | 0 (0.00%)              | 0.49    |
| S522C**            | 0 (0.00%)            | 1 (0.14%)              | 1.00    |
| G533A              | 0 (0.00%)            | 2 (0.28%)              | 0.50    |
| I540T              | 0 (0.00%)            | 2 (0.28%)              | 0.50    |
| V555A              | 4 (0.59%)            | 1 (0.14%)              | 0.21    |
| Y558H              | 0 (0.00%)            | 1 (0.14%)              | 1.00    |
| K563E              | 0 (0.00%)            | 1 (0.14%)              | 1.00    |
| W565R <sup>‡</sup> | 1 (0.15 %)           | 0 (0.00%)              | 0.49    |
| E567K <sup>‡</sup> | 1 (0.15 %)           | 0 (0.00%)              | 0.49    |
| A569T              | 0 (0.00%)            | 1 (0.14%)              | 1.00    |
| A569S              | 0 (0.00%)            | 1 (0.14%)              | 1.00    |
| P574L*             | 0 (0.00%)            | 1 (0.14%)              | 1.00    |
| A578S <sup>‡</sup> | 3 (0.44%)            | 7 (0.98%)              | 0.34    |
| V581I              | 1 (0.15 %)           | 0 (0.00%)              | 0.49    |
| N594K              | 0 (0.00%)            | 1 (0.14%)              | 1.00    |
| G595S              | 1 (0.15 %)           | 0 (0.00%)              | 0.49    |
| K610E <sup>‡</sup> | 1 (0.15 %)           | 0 (0.00%)              | 0.49    |
| P615S              | 1 (0.15 %)           | 0 (0.00%)              | 0.49    |
| A617T              | 0 (0.00%)            | 1 (0.14%)              | 1.00    |
| L618S <sup>‡</sup> | 1 (0.15 %)           | 0 (0.00%)              | 0.49    |
| L619S              | 0 (0.00%)            | 1 (0.14%)              | 1.00    |
| G638R              | 0 (0.00%)            | 1 (0.14%)              | 1.00    |
| A675V*             | 0 (0.00%)            | 1 (0.14%)              | 1.00    |

\*Polymorphisms identified as candidate artemisinin resistance mutations

\*\*Low frequency variants reported to be associated with delayed clearance but without statistical significance due to the low number of cases.

†Not associated with artemisinin resistance.

‡Newly reported

Supplemental Table 2. Nucleotide and amino acid haplotype diversity of *Plasmodium falciparum* isolates from seven sites in Uganda before and after the introduction of ACTs. Mixed genotypes were treated as mutant genotypes.

| Site    | ACT usage | N   | Nucleotide diversity  |    |                       | No. of amino acid haplotypes | Haplotype Diversity ( $h_d$ ) (mean $\pm$ SD) |
|---------|-----------|-----|-----------------------|----|-----------------------|------------------------------|-----------------------------------------------|
|         |           |     | $\pi$                 |    | $\theta_s$            |                              |                                               |
| Apac    | Pre-ACT   | 100 | 0.00009 $\pm$ 0.00005 | <  | 0.00085 $\pm$ 0.00000 | 4                            | 0.059 $\pm$ 0.033                             |
|         | Post-ACT  | 19  | -                     | NA | -                     | 1                            | -                                             |
| Arua    | Pre-ACT   | 86  | 0.00014 $\pm$ 0.00007 | <  | 0.00117 $\pm$ 0.00064 | 5                            | 0.091 $\pm$ 0.043                             |
|         | Post-ACT  | 40  | 0.00029 $\pm$ 0.00017 | <  | 0.00138 $\pm$ 0.00077 | 4                            | 0.146 $\pm$ 0.075                             |
| Jinja   | Pre-ACT   | 99  | 0.00006 $\pm$ 0.00004 | <  | 0.00057 $\pm$ 0.00041 | 3                            | 0.040 $\pm$ 0.027                             |
|         | Post-ACT  | 99  | 0.00018 $\pm$ 0.00007 | <  | 0.00142 $\pm$ 0.00070 | 6                            | 0.118 $\pm$ 0.044                             |
| Kampala | Pre-ACT   | 100 | 0.00009 $\pm$ 0.00005 | <  | 0.00057 $\pm$ 0.00000 | 3                            | 0.059 $\pm$ 0.033                             |
|         | Post-ACT  | 65  | 0.00018 $\pm$ 0.00008 | <  | 0.00124 $\pm$ 0.00068 | 5                            | 0.120 $\pm$ 0.055                             |
| Kanungu | Pre-ACT   | 100 | 0.00009 $\pm$ 0.00005 | <  | 0.00057 $\pm$ 0.00000 | 3                            | 0.059 $\pm$ 0.033                             |
|         | Post-ACT  | 118 | 0.00030 $\pm$ 0.00012 | <  | 0.00220 $\pm$ 0.00091 | 7                            | 0.131 $\pm$ 0.043                             |
| Mubende | Pre-ACT   | 99  | 0.00018 $\pm$ 0.00007 | <  | 0.00142 $\pm$ 0.00070 | 6                            | 0.118 $\pm$ 0.044                             |
|         | Post-ACT  | 66  | 0.00013 $\pm$ 0.00007 | <  | 0.00093 $\pm$ 0.00057 | 4                            | 0.090 $\pm$ 0.048                             |
| Tororo  | Pre-ACT   | 99  | 0.00012 $\pm$ 0.00006 | <  | 0.00114 $\pm$ 0.00062 | 5                            | 0.080 $\pm$ 0.038                             |
|         | Post-ACT  | 309 | 0.00020 $\pm$ 0.00005 | <  | 0.00396 $\pm$ 0.00000 | 18                           | 0.119 $\pm$ 0.026                             |
| Overall | Pre-ACT   | 683 | 0.00011 $\pm$ 0.00002 | <  | 0.00372 $\pm$ 0.00109 | 19                           | 0.072 $\pm$ 0.014                             |
|         | Post-ACT  | 716 | 0.00020 $\pm$ 0.00003 | <  | 0.00678 $\pm$ 0.00167 | 32                           | 0.116 $\pm$ 0.017                             |

Supplemental Table 3. Results for testing the hypothesis that all mutations in *K13PD* are selectively neutral.

| Site    | ACT usage | N   | Fu and Li's $D^*$ |          | Tajima's $D$ |          |
|---------|-----------|-----|-------------------|----------|--------------|----------|
|         |           |     | $D$               | p-value  | $D$          | p-value  |
| Apac    | Pre-ACT   | 100 | -3.86             | p < 0.02 | -1.61        | NS       |
|         | Post-ACT  | 19  | NA                | NA       | NA           | NA       |
| Arua    | Pre-ACT   | 86  | -3.46             | p < 0.02 | -1.80        | p < 0.05 |
|         | Post-ACT  | 40  | -3.38             | p < 0.02 | -1.88        | p < 0.05 |
| Jinja   | Pre-ACT   | 99  | -2.85             | p < 0.05 | -1.38        | NS       |
|         | Post-ACT  | 99  | -3.28             | p < 0.02 | -1.87        | p < 0.05 |
| Kampala | Pre-ACT   | 100 | -1.08             | NS       | -1.30        | NS       |
|         | Post-ACT  | 65  | -3.69             | p < 0.02 | -1.83        | p < 0.05 |
| Kanungu | Pre-ACT   | 100 | -1.09             | NS       | -1.30        | NS       |
|         | Post-ACT  | 118 | -2.12             | NS       | -2.05        | p < 0.05 |
| Mubende | Pre-ACT   | 99  | -3.28             | p < 0.02 | -1.87        | p < 0.05 |
|         | Post-ACT  | 66  | -3.26             | p < 0.02 | -1.66        | NS       |
| Tororo  | Pre-ACT   | 99  | -7.98             | p < 0.02 | -1.78        | NS       |
|         | Post-ACT  | 309 | -7.77             | p < 0.02 | -2.40        | p < 0.01 |
| Overall | Pre-ACT   | 683 | -7.98             | p < 0.02 | -2.28        | p < 0.01 |
|         | Post-ACT  | 716 | -9.26             | p < 0.02 | -2.53        | p < 0.01 |

\*Outgroup is the *P. praefalciparum* kelch protein K13 gene sequenced from the G01 strain (PPRFG01\_1345600)

Supplemental Table 4. Tests for adaptive selection acting on *K13PD* in samples collected before and after the implementation of ACTs.

| Site    | ACT exposure | N   | McDonald and Kreitman test result |     |                          |      |                | Codon-based Test of Neutrality results |                |
|---------|--------------|-----|-----------------------------------|-----|--------------------------|------|----------------|----------------------------------------|----------------|
|         |              |     | Interspecies fixed difference     |     | Intraspecific difference |      | <i>p-value</i> | dN-dS                                  | <i>p-value</i> |
|         |              |     | Syn                               | N.S | Syn                      | N.S. |                |                                        |                |
| Apac    | Pre-ACT      | 100 | 4                                 | 0   | 1                        | 2    | 0.143          | -0.428                                 | 0.669          |
|         | Post-ACT     | 19  | 4                                 | 0   | 0                        | 0    | NA             | NA                                     | NA             |
| Arua    | Pre-ACT      | 86  | 4                                 | 0   | 0                        | 4    | <b>0.029</b>   | 2.152                                  | <b>0.033</b>   |
|         | Post-ACT     | 40  | 4                                 | 0   | 1                        | 3    | 0.143          | -0.139                                 | 0.889          |
| Jinja   | Pre-ACT      | 99  | 4                                 | 0   | 1                        | 1    | 0.333          | -0.717                                 | 0.475          |
|         | Post-ACT     | 99  | 4                                 | 0   | 3                        | 2    | 0.444          | -1.197                                 | 0.234          |
| Kampala | Pre-ACT      | 100 | 4                                 | 0   | 1                        | 1    | 0.333          | -0.406                                 | 0.686          |
|         | Post-ACT     | 65  | 4                                 | 0   | 2                        | 2    | 0.429          | -1.014                                 | 0.312          |
| Kanungu | Pre-ACT      | 100 | 4                                 | 0   | 2                        | 0    | NA             | -1.483                                 | 0.141          |
|         | Post-ACT     | 118 | 4                                 | 0   | 5                        | 3    | 0.491          | -1.603                                 | 0.112          |
| Mubende | Pre-ACT      | 99  | 4                                 | 0   | 1                        | 4    | <b>0.048</b>   | 0.339                                  | 0.735          |
|         | Post-ACT     | 66  | 4                                 | 0   | 1                        | 2    | 0.143          | -0.398                                 | 0.692          |
| Tororo  | Pre-ACT      | 99  | 4                                 | 0   | 2                        | 2    | 0.429          | -1.018                                 | 0.311          |
|         | Post-ACT     | 309 | 4                                 | 0   | 7                        | 11   | 0.090          | -1.327                                 | 0.187          |
| Overall | Pre-ACT      | 683 | 4                                 | 0   | 7                        | 11   | 0.090          | -1.137                                 | 0.258          |
|         | Post-ACT     | 716 | 4                                 | 0   | 14                       | 18   | 0.104          | -1.104                                 | 0.272          |

Supplemental Table 5: Sequence reference information.

| Site    | N   | Years     | Associated Publication     | Sequencing | Accession Numbers                                                                                                                                                                                                                                                              |
|---------|-----|-----------|----------------------------|------------|--------------------------------------------------------------------------------------------------------------------------------------------------------------------------------------------------------------------------------------------------------------------------------|
| Apac    | 100 | 2003-2004 | Francis et al 2006 JID     | New        | MN071745.1-MN071844.1                                                                                                                                                                                                                                                          |
|         | 19  | 2013      | Yeka et al 2016 JID        | Published  | MN072169.1-MN072187.1                                                                                                                                                                                                                                                          |
| Arua    | 84  | 2004      | Francis et al 2006 JID     | New        | MN071845.1-MN071930.1                                                                                                                                                                                                                                                          |
|         | 43  | 2016      | Asua et al 2018 AAC        | Published  | MH789087.1-MH789129.1                                                                                                                                                                                                                                                          |
| Jinja   | 96  | 2002-2003 | Francis et al 2006 JID     | New        | MN071931.1-MN072029.1                                                                                                                                                                                                                                                          |
|         | 51  | 2012-2015 | Tumwebaze 2017 JID         | Published  | MN072188.1-MN072238.1                                                                                                                                                                                                                                                          |
|         | 48  | 2016      | Asua et al 2018 AAC        | Published  | MH789130.1-MH789177.1                                                                                                                                                                                                                                                          |
| Kampala | 98  | 1998-1999 | Dorsey et al 2001 JID      | New        | MN072031.1-MN072129.1                                                                                                                                                                                                                                                          |
|         | 65  | 2014      | Cooper et al 2015 AAC      | Published  | KR055739.1-KR055753.1;<br>KR055755.1-KR055804.1                                                                                                                                                                                                                                |
| Kanungu | 100 | 2003      | Francis et al 2006 JID     | New        | MN071546.1-MN071645.1                                                                                                                                                                                                                                                          |
|         | 18  | 2013-2014 | Yeka et al 2016 JID        | Published  | MN072130.1-MN072147.1                                                                                                                                                                                                                                                          |
|         | 55  | 2012-2015 | Tumwebaze 2017 JID         | Published  | MN072239.1-MN072291.1                                                                                                                                                                                                                                                          |
|         | 48  | 2016      | Asua et al 2018 AAC        | Published  | MH789178.1-MH789225.1                                                                                                                                                                                                                                                          |
| Mubende | 98  | 2002-2003 | Francis et al 2006 JID     | New        | MN071646.1-MN071744.1                                                                                                                                                                                                                                                          |
|         | 21  | 2013      | Yeka et al 2016 JID        | Published  | MN072148.1-MN072168.1                                                                                                                                                                                                                                                          |
|         | 45  | 2016      | Asua et al 2018 AAC        | Published  | MH789316.1- MH789360.1                                                                                                                                                                                                                                                         |
| Tororo  | 97  | 2003-2004 | Francis et al 2006 JID     | New        | MN071447.1-MN071545.1                                                                                                                                                                                                                                                          |
|         | 161 | 2008-2012 | Conrad et al 2014 PLoS ONE | Published  | KM187879.1-KM187898.1;<br>KM187900.1-KM187938.1;<br>KM187940.1-KM187944.1;<br>KM187946.1-KM187955.1;<br>KM187957.1-KM187960.1;<br>KM187962.1-KM187982.1;<br>KM187984.1-KM188041.1;<br>KM188045.1-KM188048.1                                                                    |
|         | 57  | 2014-2015 | Conrad et al 2017 JID      | Published  | MF285352.1-MF285358.1;<br>MF285360.1-MF285373.1;<br>MF285375.1-MF285379.1;<br>MF285381.1-MF285383.1;<br>MF285385.1-MF285387.1;<br>MF285389.1;<br>MF285391.1-MF285394.1;<br>MF285396.1-MF285398.1;<br>MF285401.1-MF285402.1;<br>MF285404.1-MF285407.1;<br>MF285409.1-MF285413.1 |
|         | 55  | 2016      | Rasmussen et al 2017 AAC   | Published  | MF477020.1- MF477022.1;<br>MF477024.1- MF477075.1                                                                                                                                                                                                                              |
|         | 52  | 2012-2015 | Tumwebaze et al 2017 JID   | Published  | MN072292.1-MN072342.1                                                                                                                                                                                                                                                          |
|         | 48  | 2016      | Asua et al 2018 AAC        | Published  | MH789361.1- MH789408.1                                                                                                                                                                                                                                                         |
